# Supplementary material
Source: PubMed Central journal article supplement (PMC8106641)
Supplement: NIHMS1675106-supplement-2.pdf [file NIHMS1675106-supplement-2.pdf]

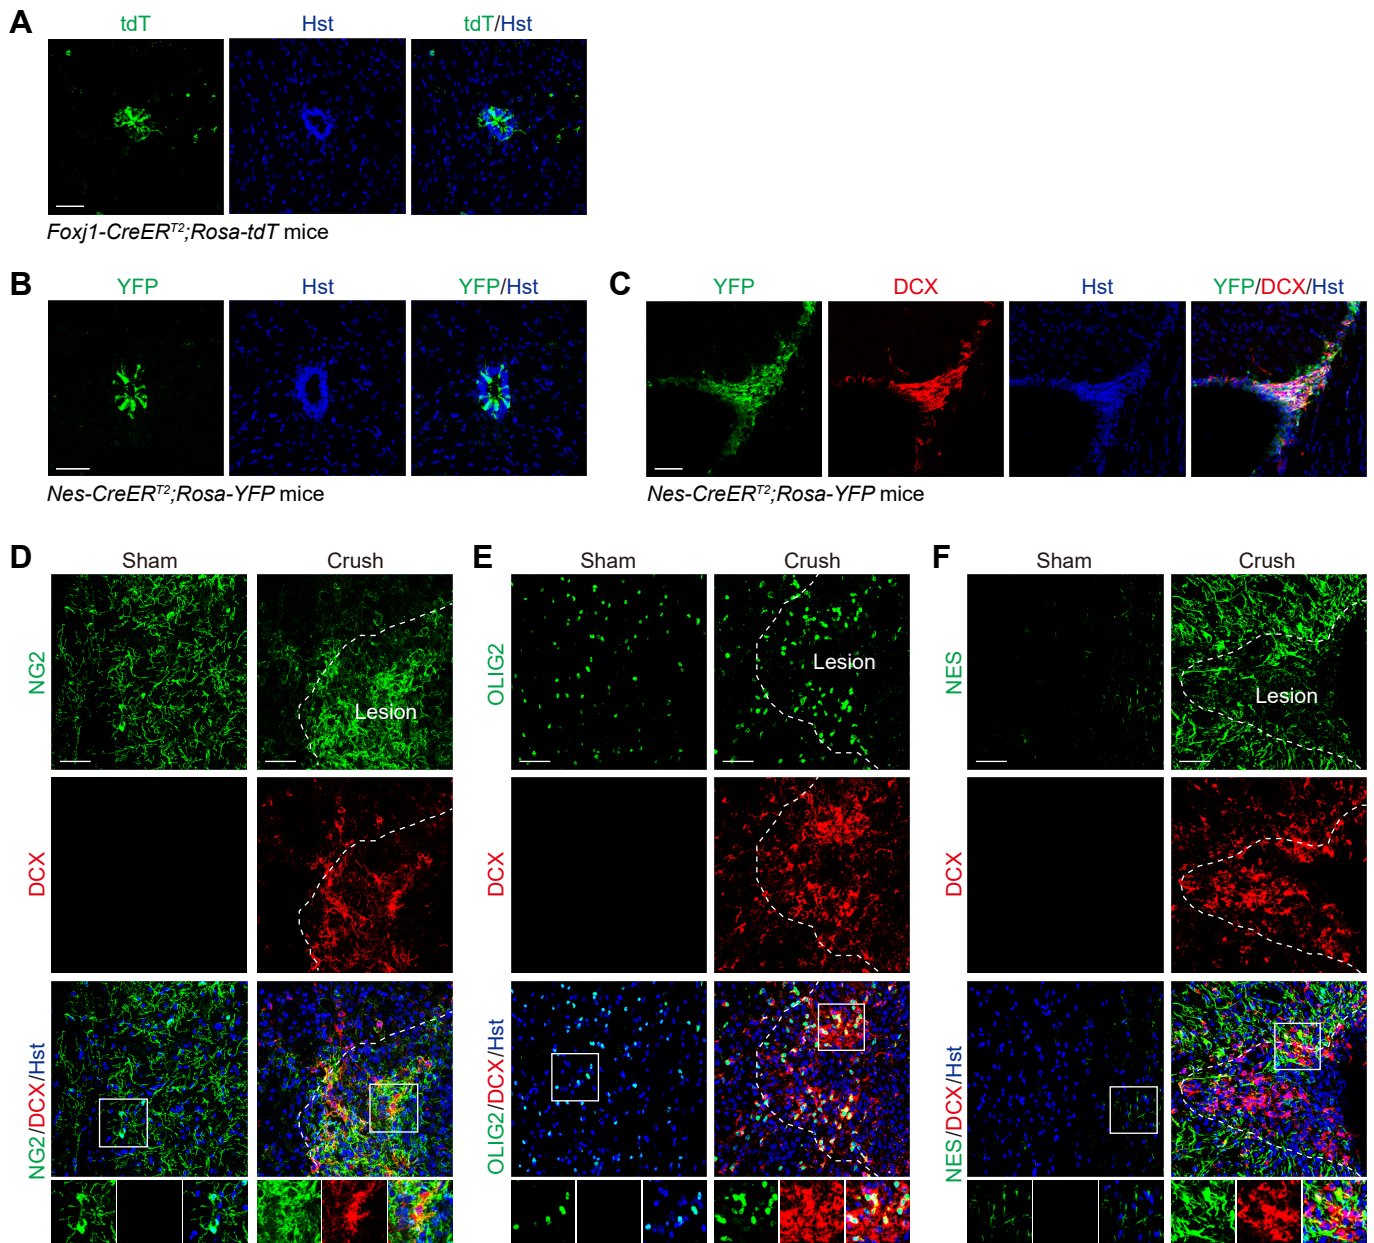

**Figure S1. Related to Figure 1. Genetic lineage-tracing and additional marker expression of SCI-induced DCX<sup>+</sup> cells.**

(A) Tracing ependymal cells lining the central canal in adult *Foxj1-CreER<sup>T2</sup>;Rosa-tdT* mice. tdT is pseudocolored as green. Scale bar, 50  $\mu$ m.

(B) Tracing spinal neural stem cells lining the central canal in adult *Nes-CreER<sup>T2</sup>;Rosa-YFP* mice. Scale bar, 50  $\mu$ m.

(C) Robust labeling of neural stem cells and DCX<sup>+</sup> cells in the lateral ventricle of adult *Nes-CreER<sup>T2</sup>;Rosa-YFP* mice. Scale bar, 50  $\mu$ m.

(D-F) Confocal images of the indicated markers surrounding the injured spinal cord regions. Mice with crush injury were analyzed at 1 week post injury (wpi). Enlarged views of the boxed regions are shown on the bottom panels. Scale bars, 50  $\mu$ m.

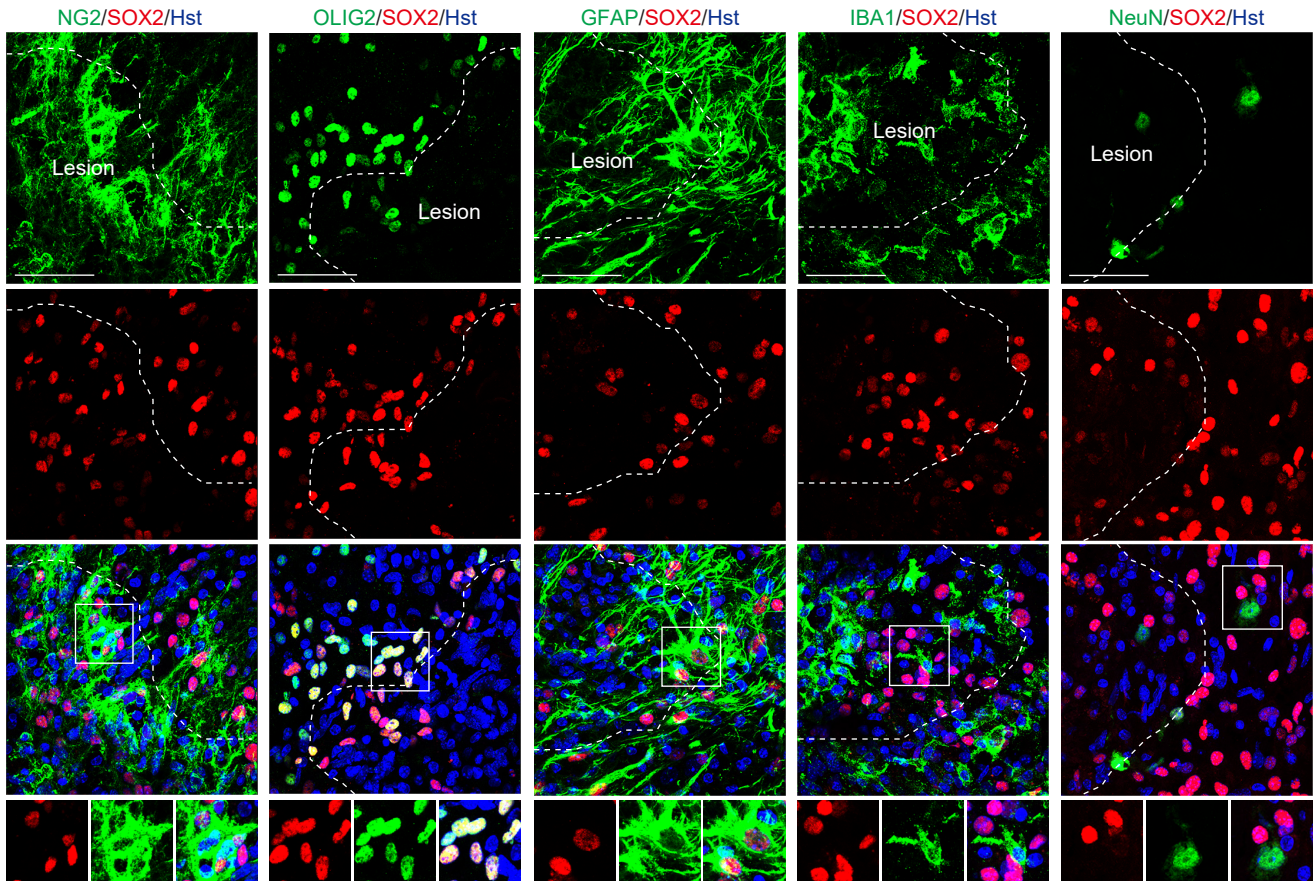

**Figure S2. Related to Figure 2. Predominant macroglial expression of SOX2 in the injured spinal cord.**

Confocal images of the indicated markers surrounding the contusion-injured spinal cord. Immunostaining were performed at 1 wpi. Enlarged views of the boxed regions are shown on the bottom panels. Scale bars, 50  $\mu$ m.

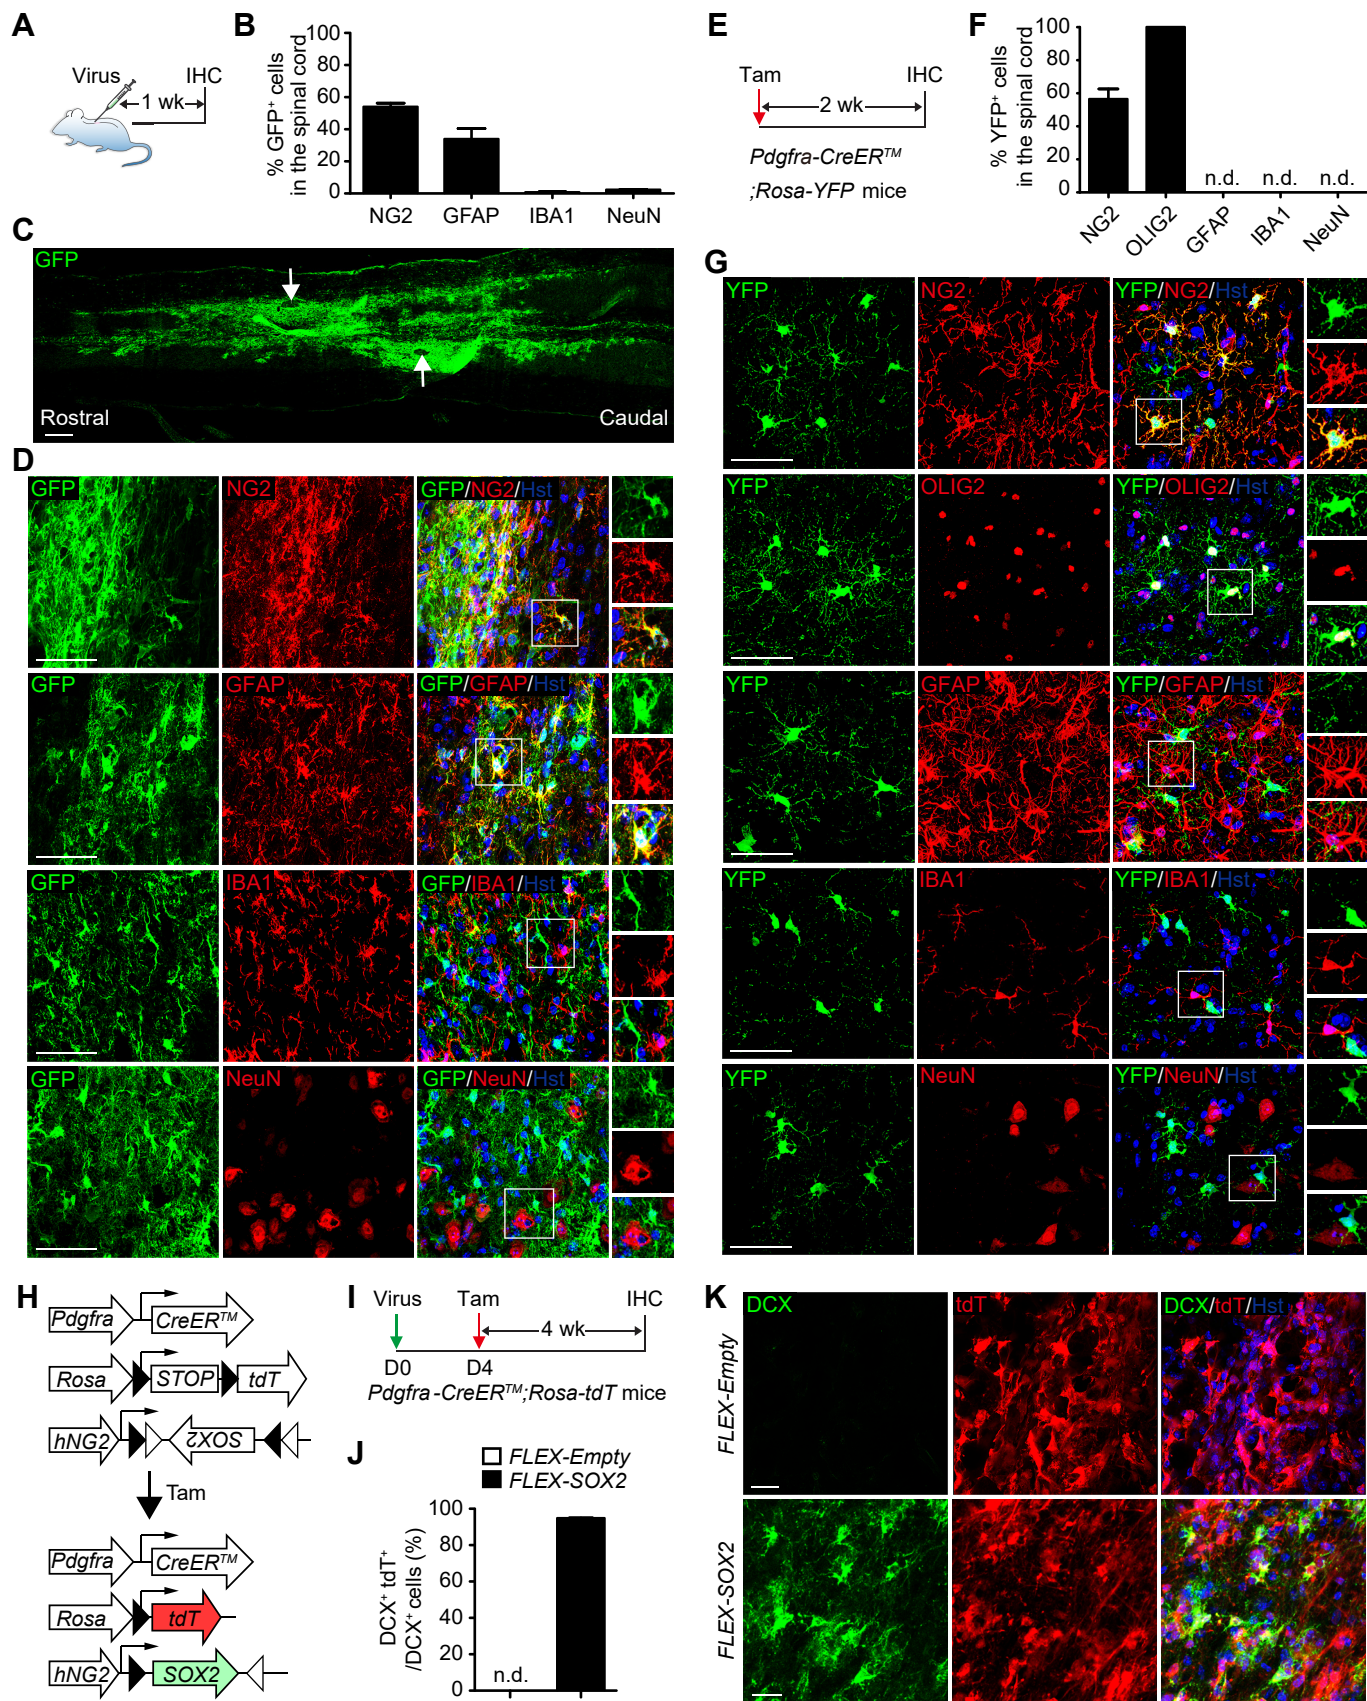

Figure S3

**Figure S3. Related to Figure 3. The specificity of *hNG2* promoter and genetic tracing of NG2 glia and their derivatives.**

(A) Experimental design for examining the specificity of *hNG2* promoter.

(B) Quantification of marker expression in GFP<sup>+</sup> cells (mean ± SEM; n = 3 mice). At least 500 GFP<sup>+</sup> cells were analyzed for each marker.

(C) A stitched image of lower magnification view of a longitudinal section from the adult spinal cord injected with the *hNG2-GFP* lentivirus at one week post virus-injection (wpv). Arrows show the viral injection sites. Scale bar, 250 μm.

(D) Confocal images of GFP<sup>+</sup> cells in the adult spinal cord. Enlarged views of the boxed regions are shown on the right panels. Scale bars, 50 μm.

(E) Experimental design for genetic lineage tracing of NG2 glia.

(F) Quantification of marker expression in YFP<sup>+</sup> cells (mean ± SEM; n = 3 mice). At least 100 YFP<sup>+</sup> cells were analyzed for each marker. n.d., not detected.

(G) Confocal images of the indicated markers in the spinal cord of adult *Pdgfra-CreER<sup>TM</sup>;Rosa-YFP* mice 2 weeks post tamoxifen administration. Enlarged views of the boxed regions are shown on the right panels. Scale bars, 50 μm.

(H) A schematic for restricted SOX2 expression in NG2 glia of *Pdgfra-CreER<sup>TM</sup>;Rosa-tdT* mice.

(I) Experimental design.

(J) Quantification of SOX2-induced DCX<sup>+</sup> cells from NG2 glia (mean ± SEM; n = 3 mice). n.d., not detected.

(K) Confocal images of the indicated markers in the spinal cord of adult *Pdgfra-CreER<sup>TM</sup>;Rosa-tdT* mice. Scale bars, 20 μm.

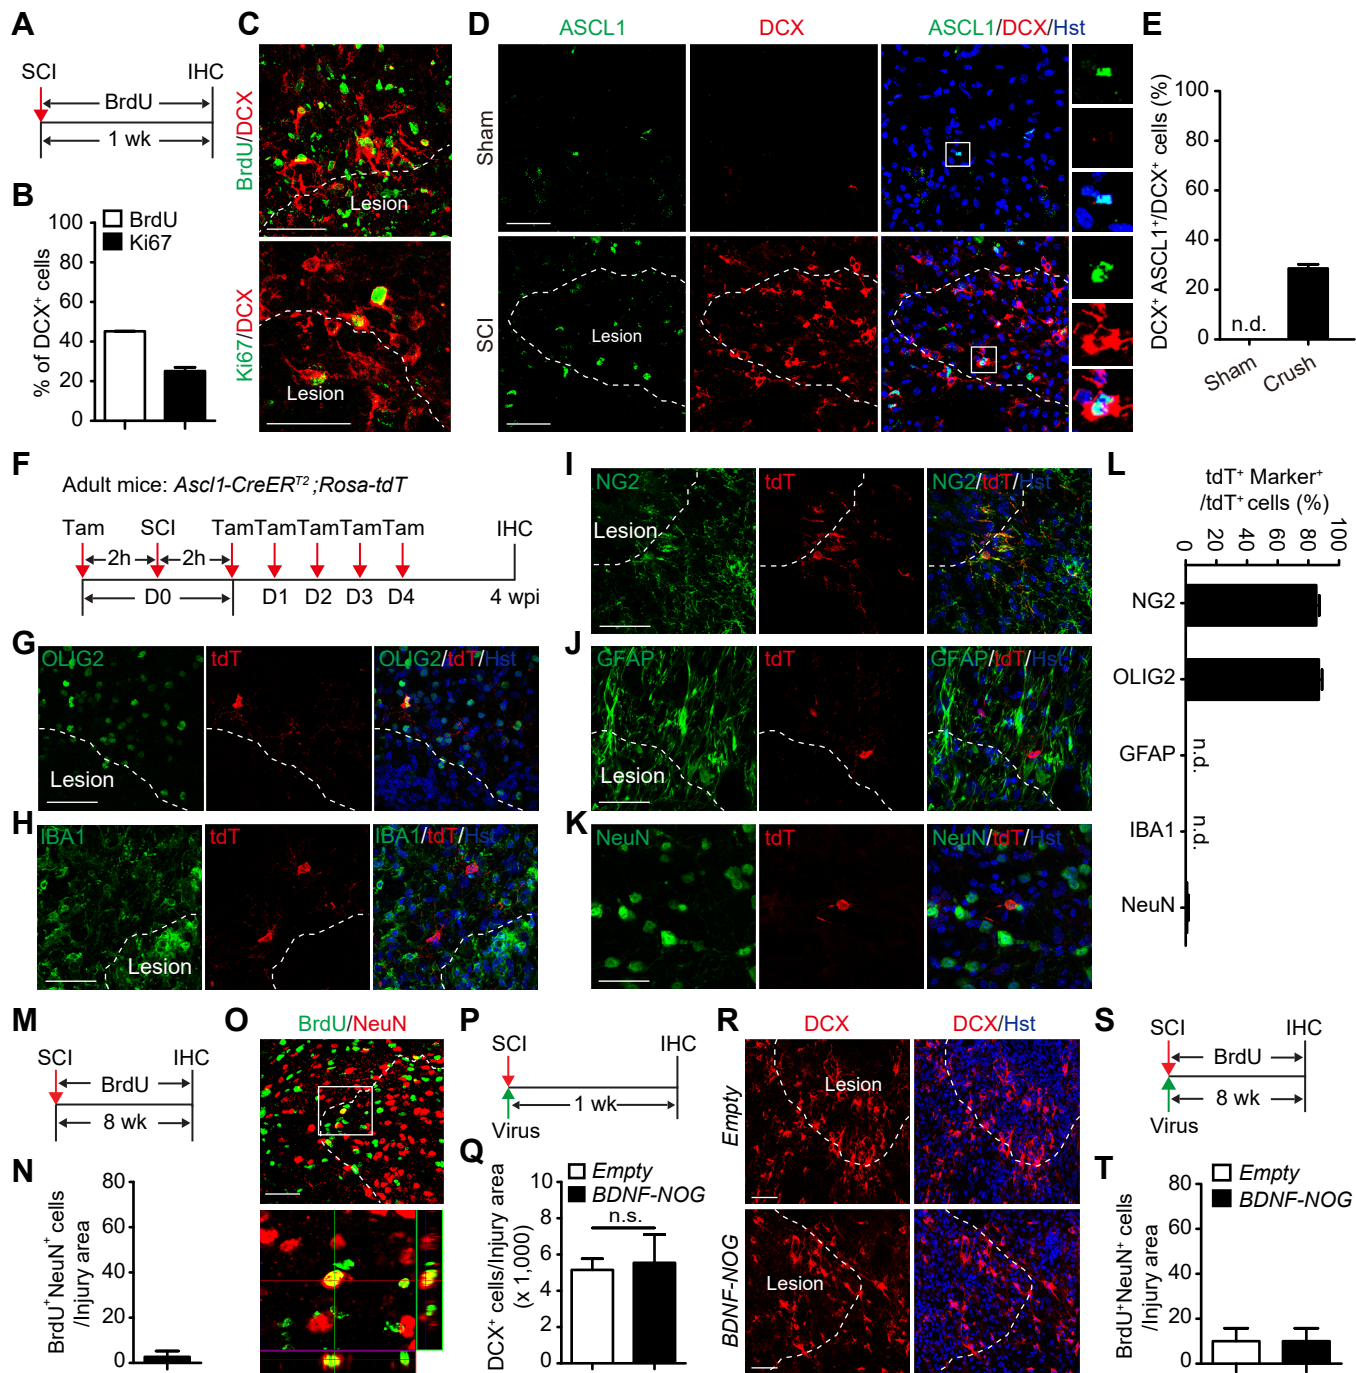

Figure S4

**Figure S4. Related to Figure 4. SCI-reprogrammed NG2 glia fail to generate mature neurons.**

(A) Experimental design for SCI-induced cell proliferation.

(B-C) Quantification and confocal images of SCI-induced DCX<sup>+</sup> cells going through proliferation (mean ± SEM; n=3 mice per group). Scale bars, 50 μm.

(D) Confocal images of the indicated marker expression at 1 wpi. Enlarged views of the boxed regions are shown on the right panels. Scale bars, 50 μm.

(E) Percentage of DCX<sup>+</sup> cells expressing ASCL1 (mean ± SEM; n = 3 mice per group).

(F) Experimental design for assessing the fate of SCI-induced ASCL1<sup>+</sup> cells.

(G-K) Confocal images of the indicated markers in the spinal cord of adult *Ascl1-CreER<sup>T2</sup>; Rosa-tdT* mice at 4 wpi. Scale bars, 50 μm.

(L) Quantification of marker expression in tdT<sup>+</sup> cells (mean ± SEM; n = 3 mice).

(M) Experimental design for analyzing SCI-induced new neurons.

(N) Quantification of SCI-induced new neurons (mean ± SEM; n=3 mice per group).

(O) Confocal images of SCI-induced new neurons at 8 wpi. An orthogonal view of the boxed region is also shown in the bottom panel. Scale bars, 50 μm.

(P) Experimental design for investigating the effect of lentivirus injection on SCI-induced DCX<sup>+</sup> cells.

(Q) Quantification of DCX<sup>+</sup> cells (mean ± SEM; n = 3-4 mice per group).

(R) Confocal images of DCX<sup>+</sup> cells in the spinal cord one-week post SCI and virus injection. Scale bars, 50 μm.

(S) Experimental design for analyzing the effect of neurotrophic factors on SCI-induced neurons.

(T) Quantification of the effect of neurotrophic factors on SCI-induced new neurons (mean ± SEM; n=3 mice per group).

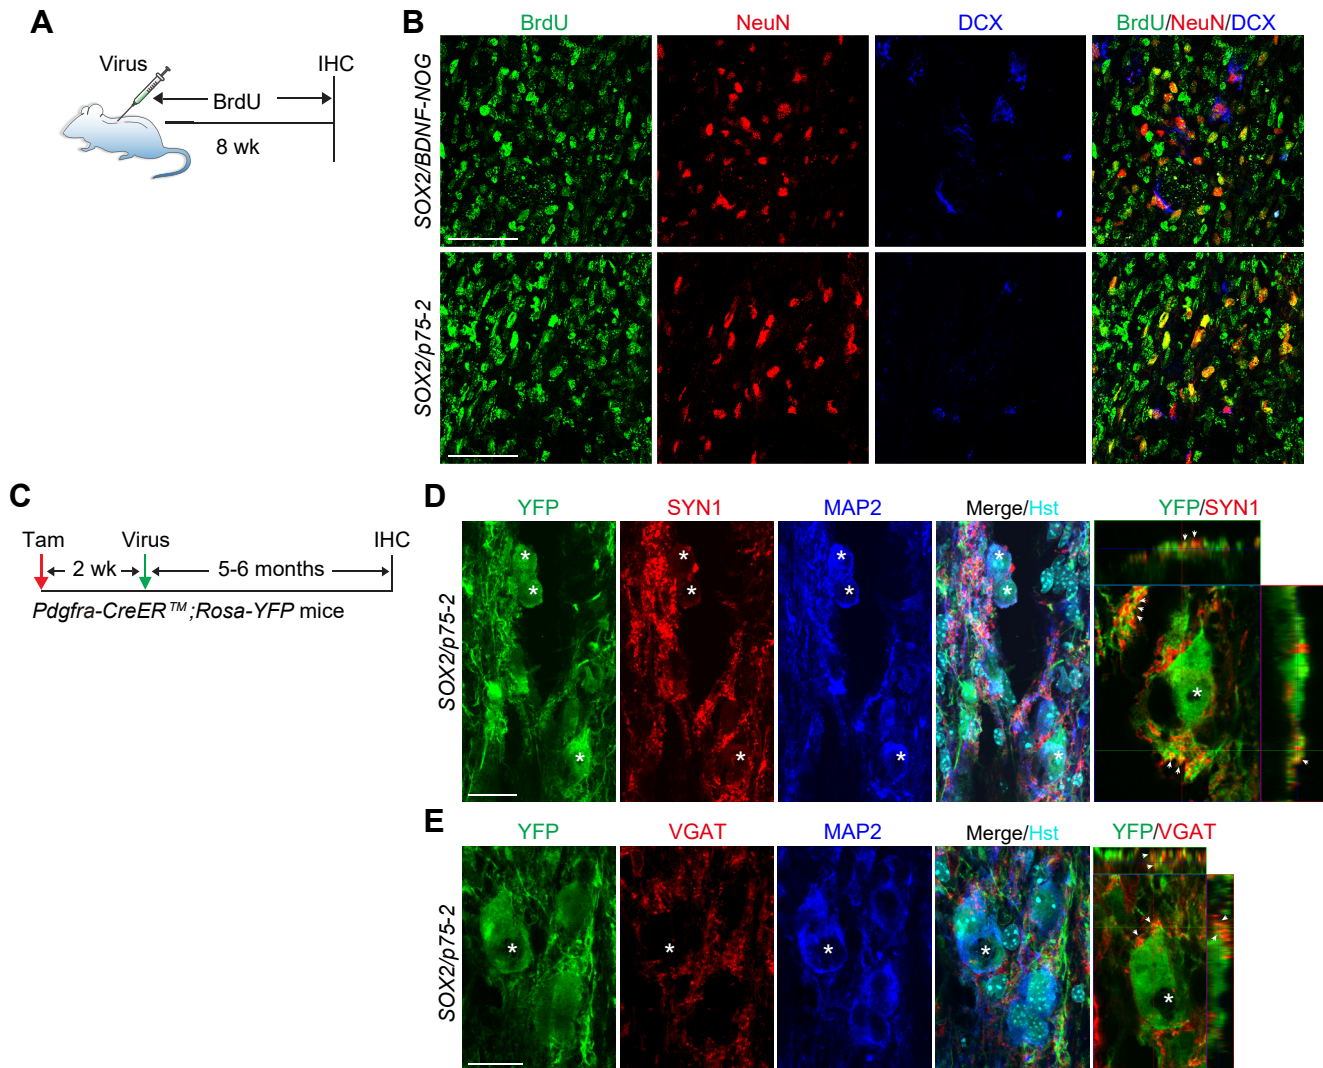

**Figure S5. Related to Figure 4. Additional analysis of SOX2-mediated reprogramming of NG2 glia.**

(A) Experimental design for BrdU-tracing.

(B) Confocal images of the indicated markers at 8 wpv, a time point with many BrdU<sup>+</sup>NeuN<sup>+</sup> neurons but few DCX<sup>+</sup> cells. Scale bars, 50  $\mu$ m.

(C) Experimental design for analyzing SOX2-induced neurons from NG2 glia.

(D) Expression of the presynaptic marker SYN1 in induced neurons. Asterisks indicate examples of NG2 glia-derived neurons, whereas arrowheads show signal co-localization in the orthogonal view. Scale bar, 20  $\mu$ m.

(E) Expression of the inhibitory neuronal marker VGAT in induced neurons. Asterisk indicates an example of NG2 glia-derived neurons, whereas arrowheads show signal co-localization in the orthogonal view. Scale bar, 20  $\mu$ m.

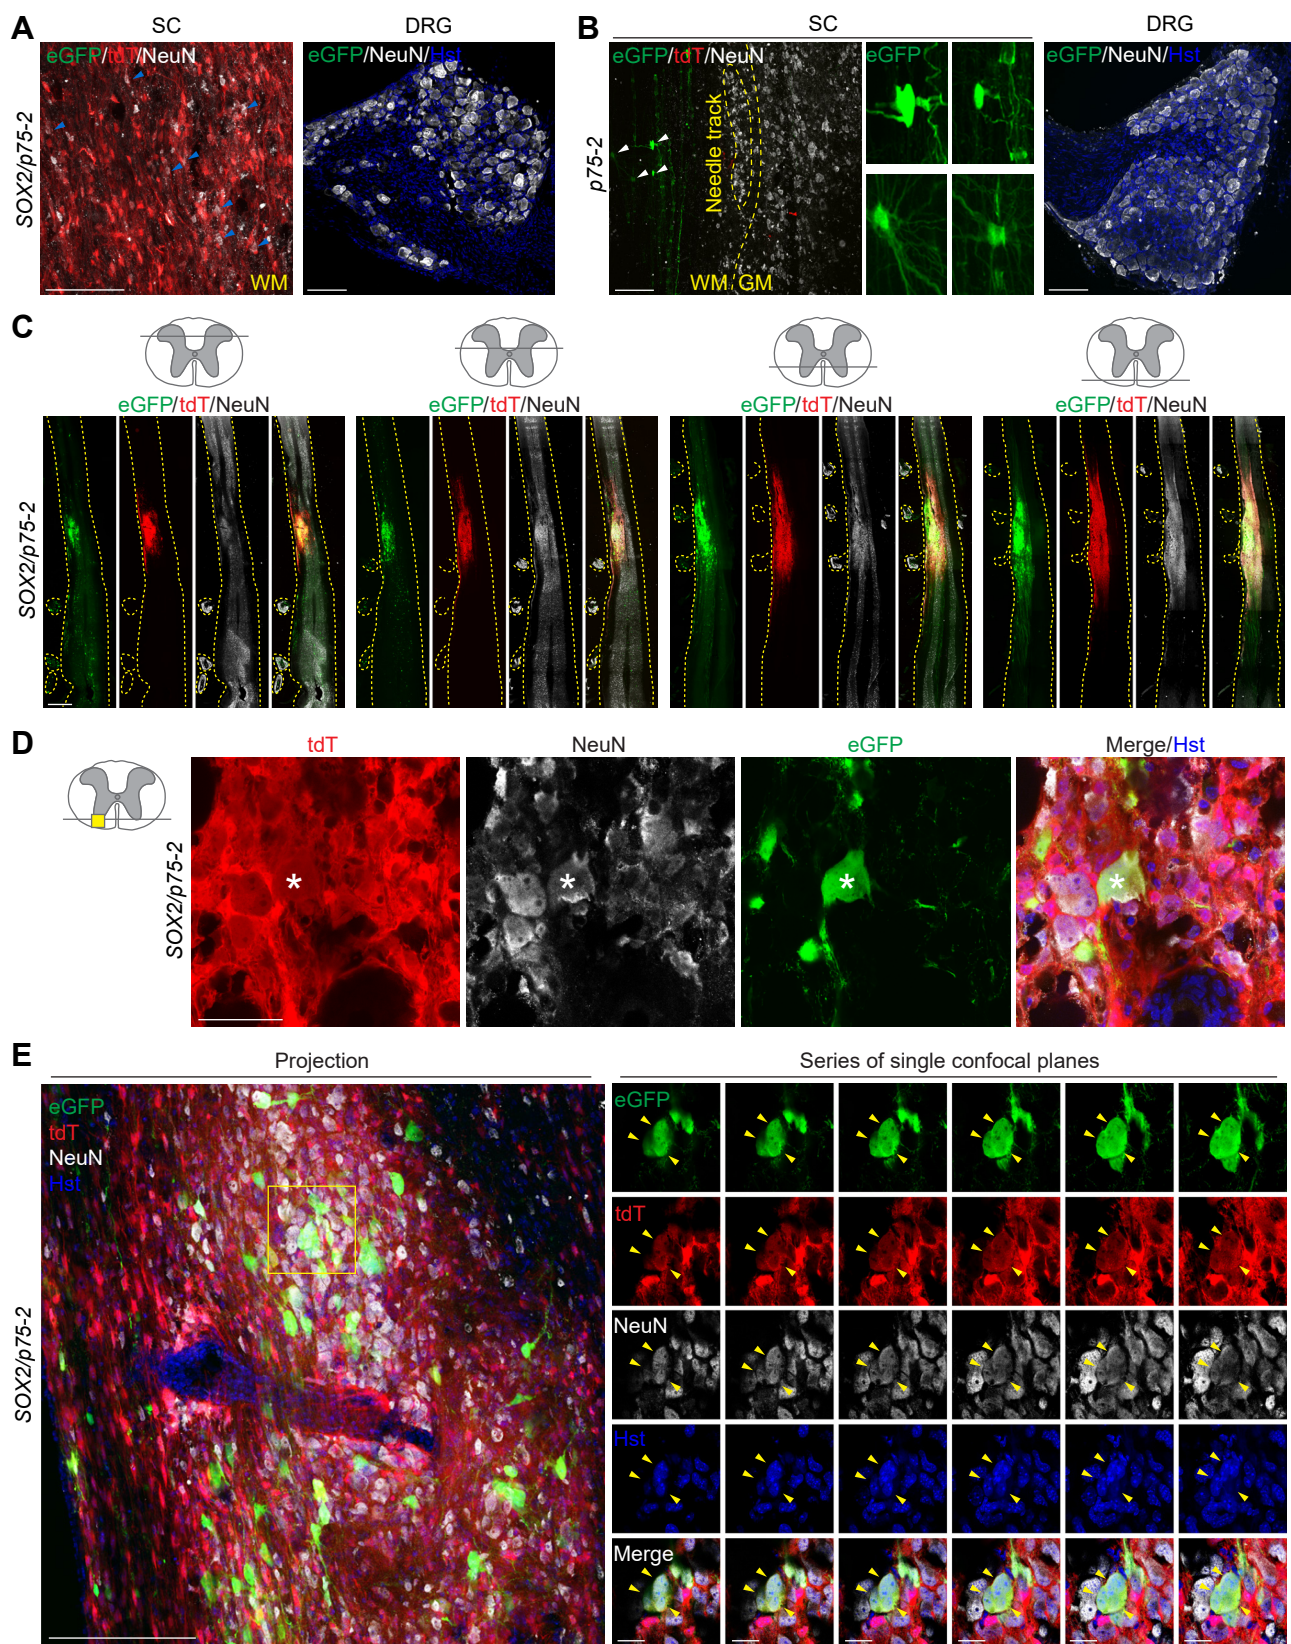

Figure S6



**Figure S6. Related to Figure 5. Rabies virus-mediated tracing of synaptic connections of NG2 glia-derived neurons.**

(A) Confocal images of cells in the spinal cord (SC) and dorsal root ganglia (DRG) of the control *Ascl1-CreER<sup>T2</sup>;Rosa-tdT* mice that were injected with *SOX2/p75-2* virus and the engineered rabies virus. Induced tdT<sup>+</sup>NeuN<sup>+</sup> neurons were only observed in the SC and were not infected with the engineered rabies virus due to the lack of TVA expression (blue arrowheads for examples; n=4). WM, white matter. Scale bars, 100  $\mu$ m.

(B) Confocal images of cells in the SC and DRG of *Ascl1-CreER<sup>T2</sup>;Rosa-tdT;Rosa-TVAg* mice that were injected with the control *p75-2* virus and the engineered rabies virus. tdT<sup>+</sup>NeuN<sup>+</sup> neurons were not detected. Only rare glial cells were infected with the engineered rabies virus (white arrowheads and enlarged views). GM, gray matter. Scale bars, 100  $\mu$ m.

(C) Stitched images of lower magnification views of the spinal cord and the attached DRGs (outlined) of *Ascl1-CreER<sup>T2</sup>;Rosa-tdT;Rosa-TVAg* mice that were injected with *SOX2/p75-2* virus and the engineered rabies virus. The relative positions of the longitudinal sections are diagramed on the top panels. Scale bar, 1 mm.

(D) Confocal images of cells from the ventral white matter surrounding the virus-injected spinal cord. Induced neurons are traced with tdT, whereas cells harboring the engineered rabies virus are indicated by eGFP. Asterisks show an example of an eGFP<sup>+</sup>tdT<sup>+</sup>NeuN<sup>+</sup> “starter” cell. Scale bar, 50  $\mu$ m.

(E) Confocal images of clustered “starter” cells in the virus-injected spinal cord. Both maximum projections (left, scale bar, 100  $\mu$ m) and a series of single confocal planes (right, scale bars, 20  $\mu$ m) are shown.

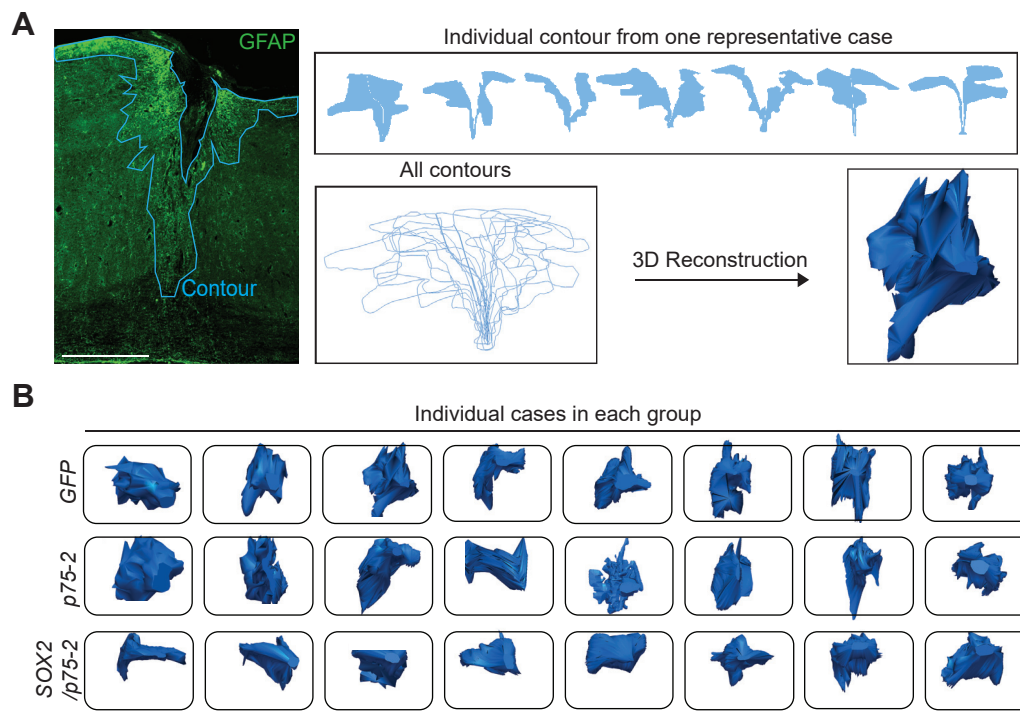

**Figure S7. Related to Figure 6. 3D reconstructed astroglial scar.**

(A) Contouring of the astroglial scar. Left, a contour line in a representative GFAP-labeled astroglial scar in a representative stitched image (scale bar, 500  $\mu\text{m}$ ); Right, Neurolucida 3D reconstruction of contours of the astroglial scar.

(B) 3D reconstructed astroglial scar from each case in all groups.
